1 **AKT1-FOXO4 AXIS REGULATES HEMOCHORIAL PLACENTATION**

2

3 **Keisuke Kozai<sup>1,\*.§</sup>, Ayelen Moreno-Irusta<sup>1,\*</sup>, Khursheed Iqbal<sup>1</sup>, Mae-Lan Winchester<sup>2†</sup>,**  
4 **Regan L. Scott<sup>1</sup>, Mikaela E. Simon<sup>1</sup>, Masanaga Muto<sup>1‡</sup>, Marc R. Parrish<sup>2</sup>, and Michael**  
5 **J. Soares<sup>1,2,3,¥</sup>**

6

7 **<sup>1</sup>Institute for Reproduction and Perinatal Research, Department of Pathology &**  
8 **Laboratory Medicine, University of Kansas Medical Center, Kansas City, KS**

9

10 **<sup>2</sup>Department of Obstetrics and Gynecology, University of Kansas Medical Center,**  
11 **Kansas City, KS**

12

13 **<sup>3</sup>Center for Perinatal Research, Children's Mercy Research Institute, Children's Mercy,**  
14 **Kansas City, MO**

15

16 **\*Contributed equally**

17 **¥Correspondence: [msoares@kumc.edu](mailto:msoares@kumc.edu)**

18

19 **§Present address:** Department of Obstetrics and Gynecology, University of Missouri-Kansas  
20 **City School of Medicine, Kansas City, MO**

21

22 **†Present address:** Department of Obstetrics and Gynecology, University Hospital, Case  
23 **Western Reserve University, Beachwood, OH 44122**

24

25 **‡Present address:** Department of Stem Cells and Human Disease Models, Research Center  
26 **for Animal Life Science, Shiga University of Medical Science, Seta, Tsukinowa-cho, Otsu,**  
27 **Shiga 520-2192, Japan**

28

29 **Running title: AKT1 and uteroplacental development**

30

31 **Keywords: AKT1, FOXO4, trophoblast, placenta, pregnancy, rat, genome editing**

32

33 **ABSTRACT**

34 AKT1 is a serine/threonine kinase implicated in fetal, placental, and postnatal growth. In  
35 this study, we investigated roles for AKT1 in placental development using a  
36 genome-edited/loss-of-function rat model. Both heterozygous and homozygous *Akt1* mutant  
37 rats were viable and fertile. Disruption of AKT1 resulted in placental, fetal, and postnatal  
38 growth restriction. *Akt1* null placentas showed deficits in both junctional zone and labyrinth  
39 zone size. Robust differences in the transcriptome of wild type versus *Akt1* null junctional  
40 zones were identified. Forkhead box O4 (*Foxo4*), which encodes a transcription factor and  
41 known AKT substrate, was abundantly expressed in the junctional zone. FOXO4 expression  
42 was prominent in the junctional zone and invasive trophoblast cells of the rat placentation site  
43 and enhanced following rat trophoblast stem cell differentiation. *Foxo4* gene disruption using  
44 genome-editing resulted in placentomegaly, including an enlarged junctional zone. AKT1 and  
45 FOXO4 regulate the expression of many of the same transcripts expressed by trophoblast  
46 cells; however, in opposite directions. In summary, we have identified AKT1 and FOXO4 as  
47 part of a regulatory network controlling hemochorial placenta development.

48

49

## 50 INTRODUCTION

51 The placenta is an extraembryonic structure essential for normal fetal development  
52 (**Maltepe & Fisher, 2015; Burton *et al.*, 2016**). Placentas possess two main functions: i)  
53 transformation of the maternal environment to support viviparity and ii) regulation of the  
54 transfer of nutrients to the fetus (**Gardner & Beddington, 1988; Soares *et al.*, 2018; Knöfler  
55 *et al.*, 2019**). These specialized functions are ascribed to trophoblast cells, which differentiate  
56 along a multi-lineage pathway and are situated within specific compartments of the placenta  
57 (**Gardner & Beddington, 1988; Soares *et al.*, 2018; Knöfler *et al.*, 2019; Aplin & Jones,  
58 2021**). Placentas come in different shapes, sizes, and connectivity to the mother (**Wooding &  
59 Burton, 2008; Roberts *et al.*, 2016**). Placentation in some mammalian species is  
60 characterized by trophoblast cells migrating into the maternal uterus where they modify the  
61 vasculature facilitating maternal nutrient flow to the placenta (**Pijnenborg *et al.*, 1981;  
62 Soares *et al.*, 2018**). This type of placenta is referred to as hemochorial (**Wooding & Burton,  
63 2008; Roberts *et al.*, 2016**). The human and rat possess hemochorial placentation where  
64 invasive trophoblast cells migrate deep into the uterine parenchyma (**Pijnenborg *et al.*, 1981;  
65 Soares *et al.*, 2018**). Regulation of deep hemochorial placentation is poorly understood. The  
66 rat represents a useful animal model for investigating the regulation of deep hemochorial  
67 placentation (**Pijnenborg & Vercruyssen, 2010; Soares *et al.*, 2012; Shukla & Soares,  
68 2022**).

69

70 The rat placenta can be divided into two main compartments: i) junctional zone; ii)  
71 labyrinth zone (**Ain *et al.*, 2006; Soares *et al.*, 2012**). The junctional zone compartment of  
72 the placenta is situated proximal to the uterine endometrium and is responsible for  
73 transforming the maternal environment, whereas the labyrinth zone is located between the  
74 junctional zone and fetus where it facilitates nutrient delivery to the fetus (**Knipp *et al.*,**

75 **1999; Soares *et al.*, 2012**). Junctional zone-specific functions include the production of  
76 peptide and steroid hormones that target maternal organs and the generation of invasive  
77 trophoblast cells that migrate into and restructure the uterine parenchyma (**Soares *et al.*, 1996,**  
78 **2012**). The extravillous trophoblast cell column is a structure within the human placentation  
79 site, which shares some of these same responsibilities (**Soares *et al.*, 2018; Knöfler *et al.*,**  
80 **2019**). The junctional zone and extravillous trophoblast cell column are pivotal to the  
81 regulation of maternal adaptations to pregnancy, yet little is known about how they are  
82 regulated.

83

84 In this report, we focus on the phosphatidylinositol 3-kinase (**PI3K**)/AKT pathway and its  
85 involvement in regulating junctional zone biology. AKT1 is one of three AKT  
86 serine/threonine kinases and represents an integral component of signal transduction  
87 pathways regulating cell proliferation, differentiation, migration, survival, and metabolism  
88 (**Manning & Toker, 2017; Cole *et al.*, 2019**). AKT1 has also been implicated in placentation  
89 and trophoblast cell development through rodent mutagenesis experiments and investigations  
90 with human trophoblast cells (**Kamei *et al.*, 2002; Yang *et al.*, 2003; Qiu *et al.*, 2004; Dash  
91 *et al.*, 2005; Kent *et al.*, 2010, 2011, 2012; Plaks *et al.*, 2011; Haslinger *et al.*, 2013;  
92 **Sharma *et al.*, 2016**). Disruptions in AKT signaling have been connected to trophoblast cell  
93 dysfunction leading to recurrent pregnancy loss, preeclampsia, and infertility (**Pollheimer &  
94 Knöfler, 2005; Ferretti *et al.*, 2007; Fisher, 2015; Burton & Jauniaux, 2018**). Herein we  
95 show that AKT1 inactivation leads to placental and fetal growth restriction in the rat. AKT1  
96 acts via phosphorylation of its target proteins leading to functional changes, including  
97 activation or inhibition of the target protein function (**Manning & Toker, 2017; Cole *et al.*,**  
98 **2019**). We identified forkhead box O4 (**FOXO4**), a transcription factor, as an AKT1 substrate  
99 within the rat junctional zone and in rat trophoblast cells and demonstrated FOXO4**

100 involvement in junctional zone development and the regulation of trophoblast cell  
101 differentiation.

102

## 103 **RESULTS**

### 104 **Generation of an *Akt1* mutant rat model**

105 We examined the role of AKT1 in regulating deep placentation in the rat using  
106 CRISPR/Cas9 genome editing. A mutant rat strain possessing a 1,332 bp deletion within the  
107 *Akt1* gene was generated (**Fig. 1A and B**). The deletion included part of Exon 4, the entire  
108 region spanning Exon 5 through Exon 6, and part of Exon 7 and led to a frameshift and  
109 premature stop codon (**Fig. 1A and B**). The deletion effectively removed the kinase domain  
110 and regulatory regions of AKT1 (**Fig. 1C**). The *Akt1* mutation was successfully transmitted  
111 through the germline. A rat colony possessing the *Akt1* mutation was established and  
112 maintained via heterozygous x heterozygous breeding. Mating of heterozygotes produced the  
113 predicted Mendelian ratio (**Fig. 1D; Supplemental Table 1**). Placental tissues possessing a  
114 homozygous deletion within the *Akt1* locus (*Akt1*<sup>-/-</sup>) were deficient in AKT1 protein and  
115 exhibited prominent deficits in pan-AKT and phospho-AKT protein expression (**Fig. 1E**).  
116 These findings support the successful disruption of the *Akt1* locus and are consistent with  
117 AKT1 being the predominant AKT isoform within the placenta (**Yang et al., 2003; Kent et**  
118 **al., 2011; Haslinger et al., 2013**).

119

### 120 **AKT1 deficiency results in placental, fetal, and postnatal growth restriction**

121 Disruption of the *Akt1* locus in the mouse disrupts placental, fetal, and postnatal growth  
122 (**Chen et al., 2001; Cho et al., 2001; Yang et al., 2003; Plaks et al., 2011; Kent et al., 2012**).  
123 We observed a similar phenotype in the rat. Gestation day (**gd**) 18.5 placental and fetal  
124 weights and postnatal pup weights were significantly smaller in the *Akt1*<sup>-/-</sup> rat model when

125 compared to *Akt1*<sup>+/+</sup> rats (**Fig. 2A-H**). Junctional and labyrinth zone compartments of the  
126 placenta were also significantly smaller in *Akt1*<sup>-/-</sup> placentas (**Fig. 2D, E, I**).

127

### 128 **AKT1 regulates junctional zone and invasive trophoblast cell phenotypes**

129 Transcript profiles were determined for *Akt1*<sup>+/+</sup> and *Akt1*<sup>-/-</sup> gd 18.5 junctional zone tissues  
130 using RNA-sequencing (**RNA-seq**). The size and morphological phenotypes associated with  
131 inactivation of AKT1 were associated with distinct transcript profiles (**Fig. 3; Dataset 1**).  
132 Disruption of AKT1 resulted in upregulation of 254 transcripts and downregulation of 333  
133 transcripts (**Dataset 1**). Pathway analysis included signatures for cell cycle, DNA replication,  
134 cellular senescence, and PI3K-AKT signaling pathways (**Fig. 3A**). Transcripts encoding cell  
135 cycle progression were consistently repressed in the *Akt1*<sup>-/-</sup> junctional zones (**Fig. 3A and B**).  
136 In addition, we also observed prominent downregulation of a member of the expanded  
137 prolactin (**PRL**) gene family, *Prl8a4*, and the upregulation of cellular communication  
138 network factor 3 (*Ccn3*, also called *Nov*; **Fig. 3B**).

139

140 The junctional zone serves as the source of invasive trophoblast cells entering the uterus.  
141 Consequently, we investigated the uterine-placental interface of *Akt1*<sup>+/+</sup> and *Akt1*<sup>-/-</sup> placentas  
142 and monitored the surface area occupied by intrauterine invasive trophoblast cells and the  
143 expression of invasive trophoblast cell-specific transcripts. *Akt1*<sup>-/-</sup> invasive trophoblast cells  
144 exhibited decreased infiltration into the uterus (**Supplemental Fig. 1A-C**). We also observed  
145 approximately a 50% decrease in the expression of cytokeratin transcripts, which are  
146 typically expressed by invasive trophoblast cells within the uterine-placental interface  
147 (**Supplemental Fig. 1D**). More prominent decreases in expression of invasive  
148 trophoblast-cell specific transcripts were observed in uterine-placental interface tissue  
149 associated with *Akt1*<sup>-/-</sup> placentas (**Supplemental Fig. 1D**).

150

151 Collectively, the data indicate that AKT1 signaling has profound effects on development  
152 of the junctional zone and the invasive trophoblast cell lineage.

153

#### 154 **FOXO4 is a target of PI3K/AKT signaling**

155 Forkhead box (**FOX**) transcription factors are known targets of PI3K/AKT signaling and  
156 have key roles in regulating developmental processes (**Lam et al., 2013; Schmitt-Ney, 2020;**  
157 **Herman et al., 2021**). We interrogated RNA-seq datasets from wild type gd 18.5 junctional  
158 zone for FOX family transcription factors. Transcripts for several FOX transcription factors  
159 were detected (transcripts per million, TPM value  $\geq 1.0$ ) (**Fig. 4A**). *Foxo4* transcripts were  
160 striking in their abundance relative to all other FOX family members. AKT1 did not  
161 significantly affect expression levels for any of the FOX family transcripts (**Dataset 1**).  
162 *Foxo4* transcripts were specifically localized to the junctional zone and a subset of invasive  
163 trophoblast cells localized to uterine spiral arteries, termed endovascular invasive trophoblast  
164 cells (**Fig. 4B and C**). Total and phosphorylated FOXO4 protein were significantly  
165 diminished in *Akt1* null junctional zones (**Fig. 4D**). We next explored FOXO4 in  
166 differentiated rat trophoblast stem (**TS**) cells, a model for trophoblast cell lineages found in  
167 the junctional zone (**Asanoma et al., 2011**). *Foxo4* transcript and total and phosphorylated  
168 FOXO4 protein showed striking increases in abundance following TS cell differentiation (**Fig.**  
169 **4E-F**). As previously demonstrated, AKT activity increased following trophoblast cell  
170 differentiation (**Kamei et al., 2002; Kent et al., 2010, 2011; Fig. 4G**). AKT activation was  
171 required for optimal FOXO4 phosphorylation (**Fig. 4G**). Thus, we established a link between  
172 PI3K/AKT signaling and FOXO4 in trophoblast cell lineage development.

173

#### 174 **Generation of a *Foxo4* mutant rat model**

175 We examined the role of FOXO4 in regulating placentation in the rat using CRISPR/Cas9  
176 genome editing. The *Foxo4* gene consists of four exons and resides on the X chromosome  
177 (**Liu et al., 2020**). A mutant rat strain possessing a 3,096 bp deletion within the *Foxo4* gene  
178 was generated (**Fig. 5A and B**). The deletion included the 3' part of Exon 2 and the 5' part of  
179 Exon 3 and led to a frameshift and a premature stop codon (**Fig. 5A and B**). The deletion  
180 effectively disrupted the conserved forkhead DNA binding domain and removed nuclear  
181 localization, nuclear export, and transactivation domains of FOXO4 (**Fig. 5C**). The *Foxo4*  
182 mutation was successfully transmitted through the germline (**Fig. 5D; Supplemental Table**  
183 **2**). A rat colony possessing the *Foxo4* mutation was established and maintained via  
184 hemizygous male x wild type female breeding, which produced the predicted Mendelian ratio  
185 (**Supplemental Table 2**). Junctional zone tissues possessing a maternally inherited *Foxo4*  
186 mutation (*Foxo4*<sup>X<sup>m</sup>-</sup>) were deficient in FOXO4 protein (**Fig. 5E**). The results are consistent  
187 with paternal silencing of X chromosome-linked genes expressed in extraembryonic tissues  
188 (**Takagi & Sasaki, 1975; West et al., 1978; Hemberger, 2002**). FOXO4 was successfully  
189 disrupted in the rat.

190

### 191 **FOXO4 deficiency results in placentomegaly and a modified junctional zone phenotype**

192 Placentation site phenotypes of mice possessing mutations at the *Foxo4* locus have not  
193 been described (**Liu et al., 2020; Hosaka et al., 2004**). Rats possessing a maternally inherited  
194 mutant *Foxo4* allele (*Foxo4*<sup>X<sup>m</sup>-</sup>) exhibited placentomegaly and decreased placental efficiency  
195 (fetal/placental weight ratio) when examined on gd 18.5 (**Fig. 6A-C**) and gd 20.5  
196 (**Supplemental Fig. 2A-C**). In contrast, a paternally inherited mutant *Foxo4* allele did not  
197 significantly affect placenta or fetal weights (**Supplemental Fig. 2D and E**). FOXO4  
198 deficiency associated placentomegaly included significantly larger junctional and labyrinth  
199 zones (**Fig. 6D-G, Supplemental Fig. 2F-H**) but did not affect the intrauterine invasive



200 trophoblast cell lineage (**Supplemental Fig. 3**). Transcript profiles were determined for wild  
201 type (*Foxo4*<sup>Xm+</sup>) and *Foxo4*<sup>Xm-</sup> gd 18.5 junctional zone tissues using RNA-seq (**Fig. 6H**).  
202 Disruption of FOXO4 resulted in upregulation of 369 transcripts and downregulation of 845  
203 transcripts (**Dataset 2**). Pathway analysis included signatures for PI3K-AKT signaling, cell  
204 cycle, DNA replication, extracellular matrix receptor interaction, and complement and  
205 coagulation pathways (**Fig. 6H**). Junctional adhesion molecule-like (**JAML**), lipoprotein(a)  
206 like 2 (**LPAL2**), erb-b2 receptor tyrosine kinase 3 (**ERBB3**), and growth factor receptor  
207 bound protein 7 (**GRB7**) were each conspicuous in their prominent downregulation in  
208 FOXO4 deficient junctional zone tissue (**Fig. 6I**). JAML contributes to epithelial barrier  
209 function, modulates immune cell trafficking, and angiogenesis (**Kummer & Ebnet, 2018**),  
210 whereas LPAL2 is a long noncoding RNA contributing to inflammatory and oxidative stress  
211 responses (**Han et al., 2018**). JAML and LPAL2 have not previously been linked to  
212 trophoblast or placental biology. ERBB3 is a receptor for neuregulin 1 and promotes  
213 trophoblast cell survival (**Fock et al., 2015**) and GRB7 is an adaptor protein participating in  
214 signal transduction activated through ERBB3 (**Fiddes et al., 1998**). Interestingly, numerous  
215 junctional zone transcripts regulated by FOXO4 were reciprocally regulated by AKT1 (88%  
216 of transcripts upregulated in *Akt1* null were downregulated in *Foxo4* mutant tissues; 38% of  
217 transcripts downregulated in *Akt1* null were upregulated in *Foxo4* mutant tissues; **Fig. 7**). The  
218 reciprocal relationship between AKT1 and FOXO4 is evident at structural and molecular  
219 levels.

220

## 221 **FOXO4 contributes to the regulation of the trophoblast cell lineage**

222 We next modeled junctional zone cell biology using rat TS cells. The consequences of  
223 FOXO4 disruption in differentiating rat TS cells were examined. FOXO4 expression was  
224 inhibited via ectopic expression of short hairpin RNAs specific to *Foxo4* (**Fig. 8A and B**).

225 Although, a morphologic phenotype was not evident, prominent differences in the  
226 transcriptomes of TS cells expressing control versus *Foxo4* shRNAs were observed (**Fig. 8C**).  
227 Disruption of FOXO4 resulted in upregulation of 260 transcripts and downregulation of 443  
228 transcripts (**Dataset 3**). Pathway analysis included signatures for PI3K-AKT signaling,  
229 longevity regulating, calcium signaling, and glutathione metabolism pathways (**Fig. 8C**).  
230 Among the dysregulated transcripts was an upregulation of matrix metalloproteinase 12, a  
231 known constituent of endovascular invasive trophoblast cells (**Harris et al., 2010**;  
232 **Chakraborty et al., 2016**) and downregulation of trophoblast specific protein alpha, a  
233 transcript characteristic of spongiotrophoblast cells within the junctional zone (**Iwatsuki et**  
234 **al., 2000**). FOXO4 is a known regulator of responses to oxidative stress (**Liu et al., 2020**).  
235 Several transcripts associated with inflammatory and cellular stress responses, including  
236 thioredoxin interacting protein, glutathione S-transferase mu 1, arachidonate 5-lipoxygenase  
237 activating protein, interferon kappa, nuclear protein 1, and *Lpal2*, were prominently  
238 downregulated (**Sies & Cadenas, 1985**; **LaFleur et al., 2001**; **Mashima & Okuyama, 2015**;  
239 **Han et al., 2018**; **Huang et al., 2021**; **Nirgude & Choudhary, 2021**; **Qayyum et al., 2021**;  
240 **Satapathy & Wilson, 2021**).

241

## 242 **Key findings**

243 Collectively, the results indicate that AKT1 drives placental growth, including regulation  
244 of deep intrauterine trophoblast cell invasion. These actions are accomplished, at least in part,  
245 through modulation of FOXO4, which acts to restrain placental growth and coordinate  
246 responses to physiological stressors.

247

248

249

250 **DISCUSSION**

251 The rat and human possess a type of hemochorial placentation where specialized  
252 trophoblast cells penetrate deep into the uterus and transform the uterine parenchyma,  
253 including the vasculature (**Pijnenborg *et al.*, 1981; Pijnenborg & Vercruyse, 2010; Soares  
254 *et al.*, 2012**). Central to deep placentation is the source of invasive trophoblast cells, which in  
255 the rat is a compartment within the placenta referred as the junctional zone and, in the human,  
256 the extravillous trophoblast cell column (**Soares *et al.*, 2012, 2018; Knöfler *et al.*, 2019**). In  
257 addition to an intrauterine role, the cellular constituents of these placental compartments  
258 produce hormones directed to maternal tissues with actions that ensure in utero survival and  
259 promotion of fetal growth (**Soares *et al.*, 1996; John, 2017**). In this report, AKT1 and  
260 FOXO4 were identified as regulators of rat junctional zone development. In vivo disruption  
261 of AKT1 and FOXO4 led to opposite effects on junctional zone development. AKT1  
262 deficiency resulted in growth restriction of the junctional zone, phenotypic alteration of the  
263 invasive trophoblast cell lineage, as well as compromised fetal and postnatal growth, and  
264 AKT1 was capable of phosphorylating FOXO4 in rat trophoblast cells. Deficiency of FOXO4  
265 resulted in an expanded junctional zone. Deficits in AKT1 or FOXO4 also impacted  
266 transcriptomic profiles of the junctional zone. The findings indicate that AKT1 and FOXO4  
267 are part of a gene regulatory network controlling hemochorial placentation.

268

269 AKT1 signaling influenced placental development. *Akt1* null mutations in the mouse and  
270 rat yield similar phenotypes characterized by placental, fetal, and postnatal growth restriction  
271 (**Chen *et al.*, 2001; Cho *et al.*, 2001; Yang *et al.*, 2003; Plaks *et al.*, 2011; Kent *et al.*, 2012**).  
272 Smaller junctional zones accompanying AKT1 deficiency were associated with a  
273 downregulation of transcripts encoding proteins driving cell proliferation. These results imply  
274 that size differences of junctional zone compartments in the wild type versus *Akt1* nulls were

275 related to, at least in part, diminished trophoblast cell proliferation in *Akt1* junctional zone  
276 tissues. The data also fit well with known actions of AKT signaling promoting cell  
277 proliferation in a wide range of cell types (**Manning & Cantley, 2007; Manning & Toker,**  
278 **2017; Cole *et al.*, 2019**). AKT1 disruption also altered differentiated junctional zone  
279 trophoblast cell phenotypes. As cellular constituents of the junctional zone differentiate, they  
280 acquire the capacity to express several members of the expanded prolactin (**PRL**) family of  
281 hormones/cytokines (**Soares, 2004; Alam *et al.*, 2006; Soares *et al.*, 2007**). The expression  
282 of PRL8A4, a member of the expanded PRL family, was dramatically downregulated in *Akt1*  
283 null junctional zones. PRL8A4 is an orphan ligand with little known of its significance to the  
284 biology of pregnancy other than as a signature feature of the differentiated junctional zone  
285 phenotype (**Iwatsuki *et al.*, 1998; Soares *et al.*, 2007**). AKT signaling has previously been  
286 implicated in the regulation of the differentiation of rodent and human trophoblast cells  
287 (**Kamei *et al.*, 2003; Kent *et al.*, 2010, 2011; Haslinger *et al.*, 2013**). Disruption of *Akt1* also  
288 interfered with invasive trophoblast cell development. Trophoblast cell infiltration into the  
289 uterine-placental interface was diminished in *Akt1* nulls as was the expression of transcripts  
290 indicative of the invasive trophoblast cell lineage. Involvement of AKT signaling has also  
291 been implicated in the development of the human extravillous trophoblast cell lineage  
292 (**Pollheimer & Knöfler, 2005; Haslinger *et al.*, 2013; Morey *et al.*, 2021**). AKT signaling  
293 could affect invasive trophoblast cell development through its actions on their origin in the  
294 junctional zone and EVT cell column or alternatively, their maturation as they invade into the  
295 uterus. Finally, the impact of AKT signaling in invasive trophoblast cell development may be  
296 more profound than observed with AKT1 deficiency due to compensatory activities of AKT2  
297 and AKT3 (**Kent *et al.*, 2011; Haslinger *et al.*, 2013**).

298

299 AKT1 regulates cellular function through its actions as a serine/threonine kinase and thus,  
300 phosphorylation of its substrates (**Manning & Cantley, 2007; Manning & Toker, 2017;**  
301 **Cole et al., 2019**). The forkhead box (**FOX**) family of transcription factors are  
302 well-established targets of AKT action (**Lam et al., 2013; Schmitt-Ney, 2020; Herman et al.,**  
303 **2021**). Among FOX family members, FOXO4 expression was uniquely elevated in the rat  
304 junctional zone. FOXO4 phosphorylation state in trophoblast cells was affected by AKT  
305 signaling. AKT-mediated phosphorylation of FOXO4 leads to FOXO4 exit from the nucleus  
306 and inactivation (**Schmitt-Ney, 2020; Herman et al., 2021**), which might suggest that an  
307 AKT1 deficiency would result in the stabilization of FOXO4 protein in the junctional zone.  
308 Instead, AKT1 deficiency led to depletion of junctional zone total and phosphorylated  
309 FOXO4 proteins. Consequently, the observed *Akt1* null placental phenotype was associated  
310 with the depletion of both AKT1 and FOXO4 proteins. In addition to regulation by AKT  
311 signaling, FOXO4 activity/stability is stimulated by Jun kinase and monoubiquitylation  
312 (**Essers et al., 2004; van der Horst et al., 2006; Brenkman et al., 2008; Liu et al., 2020**),  
313 while inhibited by acetylation and polyubiquitylation (**Fukuoka et al., 2003; Huang &**  
314 **Tindall, 2011; Liu et al., 2020**). Whether AKT1 indirectly affects FOXO4 protein via  
315 impacting these other FOXO4 regulators remains to be determined.

316

317 FOXO4 is a transcription factor implicated in the regulation of the cell cycle, apoptosis,  
318 responses to oxidative stress, and a range of disease processes (**Liu et al., 2020**). The original  
319 characterization of the *Foxo4* null mouse concluded that FOXO4 did not have a singular role  
320 in the pathophysiology of the mouse (**Hosaka et al., 2004**). The absence of a reported  
321 phenotype for the *Foxo4* null mouse model was attributed to the compensatory actions of  
322 other members of the FOXO family, including FOXO1, FOXO3, and possibly FOXO6  
323 (**Hosaka et al., 2004; Liu et al., 2020**). We describe a prominent placental phenotype for the

324 *Foxo4* null rat model. The placental anomalies associated with FOXO4 deficiency were  
325 compatible with the production of viable offspring. The absence of a fertility defect in the  
326 *Foxo4* null mouse model likely precluded a closer examination of placentation (**Hosaka *et al.*,**  
327 **2004**). However, it is also possible that elements of FOXO4 action are species specific.  
328 FOXO4 is prominently expressed in the junctional zone and to a lesser extent in invasive  
329 trophoblast cells. Disruption of FOXO4 led to an expansion of both junctional and labyrinth  
330 zone placental compartments, which probably reflects cell autonomous and non-cell  
331 autonomous actions, respectively. A striking reciprocal pattern of AKT1 versus FOXO4 gene  
332 regulation within the junctional zone was demonstrated and included differentially regulated  
333 transcripts encoding proteins involved in the regulation of cell proliferation and cell death.  
334 We surmise that AKT1 promotes junctional zone growth via stimulating the expression of  
335 transcripts connected to cell cycle progression and inhibited transcripts connected to cell  
336 death, whereas the converse is true for FOXO4. These biological roles are consistent with the  
337 known actions of AKT1 and FOXO4 in other cell systems (**Manning & Toker, 2017; Liu *et***  
338 ***al.*, 2020; Herman *et al.*, 2021**). A transcriptional regulatory network involving FOXO4 has  
339 also been identified in human extravillous trophoblast cells (**Morey *et al.*, 2021**). Importantly,  
340 FOXO4 also regulates trophoblast cell responses to oxidative stress and is thus, positioned to  
341 contribute to placental adaptations to a compromised maternal environment and in disease  
342 states affecting placentation.

343

## 344 **MATERIALS AND METHODS**

### 345 **Animals**

346 Holtzman Sprague-Dawley rats were maintained in an environmentally controlled facility  
347 with lights on from 0600 to 2000 h with food and water available ad libitum. Time-mated  
348 pregnancies were established by co-housing adult female rats (8-10 weeks of age) with adult

349 male rats (>10 weeks of age). Detection of sperm or a seminal plug in the vagina was  
350 designated gd 0.5. Pseudopregnant females were generated by co-housing adult female rats  
351 (8-10 weeks of age) with adult male vasectomized males (>10 weeks of age). The detection  
352 of seminal plugs was designated pseudopregnancy day 0.5. Four to five-week-old donor rats  
353 were superovulated by intraperitoneal injection of pregnant mare serum gonadotropin (30  
354 units, G4877, Sigma-Aldrich, St. Louis, MO), followed by an intraperitoneal injection of  
355 human chorionic gonadotropin (30 units, C1063, Sigma-Aldrich) ~46 h later, and  
356 immediately mated with adult males. Zygotes were flushed from oviducts the next morning  
357 (gd 0.5). The University of Kansas Medical Center (**KUMC**) Animal Care and Use  
358 Committee approved all protocols involving the use of rats.

359

#### 360 **Tissue collection and analysis**

361 Rats were euthanized by CO<sub>2</sub> asphyxiation at designated days of gestation. Uterine  
362 segments containing placentation sites were frozen in dry ice-cooled heptane and stored at  
363 -80°C until processed for histological analyses. Alternatively, placentation sites were  
364 dissected into placentas, the adjacent uterine-placental interface tissue (also referred to as the  
365 metrial gland), and fetuses as previously described (**Ain et al., 2006**). Placentas were weighed  
366 and dissected into junctional zone and labyrinth zone compartments (**Ain et al., 2006**).  
367 Placental compartments and uterine-placental interfaces were frozen in liquid nitrogen and  
368 stored at -80°C until used for biochemical analyses. Fetuses were weighed, genotyped, and  
369 sex determined by polymerase chain reaction (**PCR**) (**Dhakar & Soares, 2017**).

370

#### 371 **Generation of *Akt1* and *Foxo4* mutant rat models**

372 Mutations at *Akt1* and *Foxo4* loci were generated using CRISPR/Cas9 genome editing  
373 (**Kaneko, 2017; Iqbal et al., 2021**). Guide RNAs targeting Exon 4 (target sequence:

374 GCCGTTTGAGTCCATCAGCC; nucleotides 356-375) and Exon 7 (target sequence:  
375 TTGTCATGGAGTACGCCAAT; nucleotides 712-731) of the *Akt1* gene (NM\_033230.3) or  
376 targeting Exon 2 (target sequence: CCAGATATACGAATGGATGGTCC; nucleotides  
377 517-539) and Exon 3 (target sequence: GTTCATCAAGGTACATAACGAGG; nucleotides  
378 631-653) of the *Foxo4* gene (NM\_001106943.1) were electroporated into single-cell rat  
379 embryos using the NEPA21 electroporator (Nepa Gene Co Ltd, Ichikawa City, Japan).  
380 Electroporated embryos were transferred to oviducts of day 0.5 pseudopregnant rats. Initially,  
381 offspring were screened for *Akt1* or *Foxo4* mutations from genomic DNA from tail-tip  
382 biopsies using the REDEExtract-N-Amp™ Tissue PCR kit (XNAT, Millipore Sigma,  
383 Burlington, MA). PCR was performed on the purified DNA samples using primers flanking  
384 the guide RNA sites, and products resolved by agarose gel electrophoresis and ethidium  
385 bromide staining. Genomic DNA containing potential mutations was amplified by PCR, gel  
386 purified, and precise boundaries of deletions determined by DNA sequencing (Genewiz Inc.,  
387 South Plainfield, NJ). Founders with *Akt1* or *Foxo4* mutations were backcrossed to wild type  
388 rats to demonstrate germline transmission. Routine genotyping was performed by PCR on  
389 genomic DNA with specific sets of primers (**Supplemental Table 3**).

390

### 391 **Western blot analysis**

392 Tissue lysates were prepared with radioimmunoprecipitation assay lysis buffer system  
393 (sc-24948A, Santa Cruz Biotechnology, Santa Cruz, CA). Protein concentrations were  
394 determined using the DC™ Protein Assay Kit (5000112, Bio-Rad Laboratories, Hercules,  
395 CA). Proteins (20 µg/lane) were separated by SDS-PAGE. Separated proteins were  
396 electrophoretically transferred to polyvinylidene difluoride membranes (10600023, GE  
397 Healthcare, Milwaukee, WI) for 1 h at 100 V on ice. Membranes were subsequently blocked  
398 with 5% milk or 5% bovine serum albumin for 1 h at room temperature and probed separately



399 with specific primary antibodies to AKT1 (1:1,000 dilution, 75692, Cell Signaling  
400 Technology, Danvers, MA), pan-AKT (1:1,000 dilution, 4691, Cell Signaling Technology),  
401 phospho-Ser<sup>473</sup> AKT (1:2,000 dilution, 4060, Cell Signaling Technology), FOXO4 (1:2,000  
402 dilution, 21535-1-AP, Proteintech, Rosemont, IL), phospho-Ser<sup>262</sup> FOXO4 (1:3,000 dilution,  
403 ab126594, Abcam, Cambridge, MA), and glyceraldehyde 3-phosphate dehydrogenase  
404 (**GAPDH**, 1:5,000 dilution, ab8245, Abcam) in Tris-buffered saline with Tween 20 (**TBST**)  
405 overnight at 4°C. After primary antibody incubation, the membranes were washed in TBST  
406 three times for ten min each at room temperature. After washing, the membranes were  
407 incubated with anti-rabbit or anti-mouse immunoglobulin G (**IgG**) conjugated to horseradish  
408 peroxidase [**HRP**, 1:5,000 dilution or 1:20,000 dilution (phospho-Ser<sup>262</sup> FOXO4), 7074S and  
409 7076S, Cell Signaling Technology] in TBST for 1 h at room temperature, washed in TBST  
410 three times for ten min each at room temperature, immersed in Immobilon Crescendo  
411 Western HRP Substrate (WBLUR0500, Sigma-Aldrich), and luminescence detected using  
412 Radiomat LS film (Agfa Healthcare, Mortsel, Belgium).

413

#### 414 **Transcript analysis**

415 Total RNA was extracted from tissues using TRI Reagent Solution (AM9738,  
416 Thermo-Fisher, Waltham, MA) according to the manufacturer's instructions. Total RNA (1  
417 µg) was reverse transcribed using a High-Capacity cDNA Reverse Transcription Kit  
418 (4368813, Thermo-Fisher). Complementary DNAs were diluted 1:10 and subjected to reverse  
419 transcription-quantitative PCR (**RT-qPCR**) using PowerUp SYBR Green Master Mix  
420 (A25742, Thermo-Fisher) and primers provided in **Supplemental Table 4**. QuantStudio 5  
421 Flex Real-Time PCR System (Applied Biosystems, Foster City, CA) was used for  
422 amplification and fluorescence detection. PCR was performed under the following  
423 conditions: 95°C for 10 min, followed by 40 cycles of 95°C for 15 sec and 60°C for 1 min.

424 Relative mRNA expression was calculated using the delta-delta Ct method. *Gapdh* was used  
425 as a reference transcript.

426

#### 427 **RNA-seq analysis**

428 Transcript profiles were generated from wild type and *Akt1*<sup>-/-</sup>, and *Foxo4*<sup>Xm</sup> junctional  
429 zone tissues, and rat differentiated TS cells expressing control or *Foxo4* shRNAs.

430 Complementary DNA libraries from total RNA samples were prepared with Illumina TruSeq  
431 RNA preparation kits according to the manufacturer's instructions (Illumina, San Diego, CA).

432 RNA integrity was assessed using an Agilent 2100 Bioanalyzer (Santa Clara, CA). Barcoded

433 cDNA libraries were multiplexed onto a TruSeq paired-end flow cell and sequenced (100-bp

434 paired-end reads) with a TruSeq 200-cycle SBS kit (Illumina). Samples were run on an

435 Illumina NovaSeq 6000 sequencer at the KUMC Genome Sequencing Facility. Reads from

436 \*.fastq files were mapped to the rat reference genome (Ensembl Rnor\_5.0.78) using CLC

437 Genomics Workbench 12.0 (Qiagen, Germantown, MD). Transcript abundance was expressed

438 as transcript per million mapped reads (TPM) and a *P* value of 0.05 was used as a cutoff for

439 significant differential expression. Statistical significance was calculated by empirical

440 analysis of digital gene expression followed by Bonferroni's correction. Pathway analysis

441 was performed using Database for Annotation, Visualization, and Integrated Discovery

442 **(DAVID; Huang *et al.*, 2009).**

443

#### 444 **Immunohistochemistry**

445 Placentation sites were embedded in optimum cutting temperature (**OCT**) compound and

446 sectioned at 10 μm thickness. Sections were fixed in 4% paraformaldehyde, washed in

447 phosphate buffered saline (pH 7.4) three times for five min each, blocked with 10% normal

448 goat serum (50062Z, Thermo-Fisher), and incubated overnight with primary antibodies: pan

449 cyokeratin (1:300 dilution, F3418, Sigma-Aldrich) to identify trophoblast cells and vimentin  
450 (1:300 dilution, sc-6260, Santa Cruz Biotechnology) to distinguish placental compartments.  
451 After washing with phosphate buffered saline (pH 7.4), sections were incubated with  
452 corresponding secondary antibodies: Alexa 568-conjugated goat anti-rabbit IgG (1:500  
453 dilution, A11011, Thermo-Fisher) or rabbit anti-mouse IgG conjugated to HRP (1:500  
454 dilution, A9044, Sigma-Aldrich) for 3 h at room temperature and color development with a  
455 3-amino-9-ethylcarbazole (AEC) substrate kit (SK-4200, Vector Laboratories). Sections were  
456 then mounted with Fluoromount-G mounting media (0100-01, Southern Biotech,  
457 Birmingham, AL) and examined microscopically. Fluorescence images were captured on a  
458 Nikon 80i upright microscope (Nikon) with a Photometrics CoolSNAP-ES monochrome  
459 camera (Roper). The area occupied by cyokeratin-positive cells (invasive trophoblast cells)  
460 within the uterine-placental interface was quantified using ImageJ software, as previously  
461 described (Nteeba *et al.*, 2020).

462

### 463 **In situ hybridization**

464 Distributions of transcripts for *Foxo4* and *Prl7b1* were determined on cryosections of rat  
465 placentation sites. RNAscope Multiplex Fluorescent Reagent Kit version 2 (Advanced Cell  
466 Diagnostics, Newark, CA) was used for in situ hybridization analysis. Probes were prepared  
467 to detect *Foxo4* (NM\_001106943.1, 1038981-C1, target region: 750-1651) and *Prl7b1*  
468 (NM\_153738.1, 860181-C2, target region: 28-900). Fluorescence images were captured on a  
469 Nikon 80i upright microscope (Nikon) with a Photometrics CoolSNAP-ES monochrome  
470 camera (Roper).

471

### 472 **Rat TS cell culture**

473 Blastocyst-derived rat TS cells (Asanoma *et al.*, 2011) were cultured in Rat TS Cell

474 Medium [RPMI 1640 medium (11875093, Thermo-Fisher), 20% (vol/vol) fetal bovine serum  
475 (**FBS**, Thermo-Fisher), 100  $\mu$ M 2-mercaptoethanol (M7522, Sigma-Aldrich), 1 mM sodium  
476 pyruvate (11360-070, Thermo-Fisher), 100  $\mu$ M penicillin and 50 U/mL streptomycin  
477 (15140122, Thermo-Fisher)] supplemented with 70% rat embryonic fibroblast  
478 (REF)-conditioned medium prepared as described previously (Asanoma *et al.*, 2011), 25  
479 ng/ml fibroblast growth factor 4 (**FGF4**; 100-31, Peprotech), and 1  $\mu$ g/mL heparin (H3149,  
480 Sigma-Aldrich). For induction of differentiation, rat TS cells were cultured for 15 days in rat  
481 TS medium containing 1% (vol/vol) FBS without FGF4, heparin, and REF-conditioned  
482 medium. In some experiments, rat TS cells were exposed to a phosphatidylinositol 3-kinase  
483 (**PI3K**) inhibitor (LY294002, 10  $\mu$ M, 9901, Cell Signaling Technology).

484

#### 485 **Lentivirus construction and production**

486 Lentivirus construction and production were described previously (**Muto *et al.*, 2021;**  
487 **Varberg *et al.*, 2021**). Briefly, the lentivirus encoding the shRNA targeting *Foxo4*  
488 (**Supplemental Table 5**) was constructed using a pLKO.1 vector. shRNA oligo sequences  
489 used in the analyses are provided in Supplemental Table 8. Lentiviral packaging vectors were  
490 obtained from Addgene and included pMDLg/pRRE (plasmid 12251), pRSV-Rev (plasmid  
491 12253), pMD2.G (plasmid 12259). Lentiviral particles were produced using Attractene  
492 (301005, Qiagen) in human embryonic kidney (HEK) 293FT (Thermo-Fisher) cells.

493

#### 494 **Lentiviral transduction**

495 Rat TS cells were incubated with lentiviral particles for 24 h followed by selection with  
496 puromycin dihydrochloride (5  $\mu$ g/mL; A11138-03, Thermo-Fisher) for two days. Cells were  
497 then cultured for 1-3 days in Rat TS Cell Medium prior to differentiation.

498

499 **Statistical analysis**

500 Student's *t*-test, Welch's *t*-test, Dunnett's test, or Steel test were performed, where  
501 appropriate, to evaluate the significance of the experimental manipulations. Results were  
502 deemed statistically significant when  $P < 0.05$ .

503

504 **ACKNOWLEDGEMENTS**

505 The research was supported by postdoctoral fellowships from the Kansas Idea Network of  
506 Biomedical Research Excellence, P20 GM103418 (A.M.-I.), Lalor Foundation (K.K., A.M.-I.,  
507 M.M.), American Heart Association (K.K., M.M.), and an NIH National Research Service  
508 Award, HD104495 (R.L.S.) and NIH grants (HD020676, HD079363, HD099638,  
509 HD105734), and the Sosland Foundation. We also thank Stacy Oxley and Brandi Miller for  
510 administrative assistance.

511

512 **AUTHOR CONTRIBUTIONS**

513 K.K., A.M.-I., and M.J.S. conceived and designed the research; K.K., A.M.-I., K.I.,  
514 M.-L.W., R.L.S., M.E.S., M.M. performed experiments; K.K., A.M.-I., K.I., M.R.P., and  
515 M.J.S. analyzed the data and interpreted results of experiments; K.K., A.M.-I., and M.J.S.  
516 prepared figures and manuscript; All authors read, contributed to editing, and approved the  
517 final version of manuscript.

518

519 **CONFLICT OF INTEREST**

520 There is no conflict of interest that could be perceived as prejudicing the impartiality of  
521 the research reported.

522

523 **DATA AVAILABILITY**

524 RNA-seq datasets are available at the Gene Expression Omnibus (**GEO**) database,  
525 <https://www.ncbi.nlm.nih.gov/geo/> (accession number GSE205831). All data generated and  
526 analyzed in this study are included in the published article and supporting files. Resources  
527 generated from the research are available from the corresponding author upon reasonable  
528 request. AKT1 and FOXO4 mutant rat models are available through the Rat Resource and  
529 Research Center (Columbia, MO).

530

### 531 **REFERENCES**

532 Ain R, Konno T, Canham LN, Soares MJ (2006) Phenotypic analysis of the rat placenta.

533 *Methods Mol Med* 121: 295-313

534

535 Alam SM, Ain R, Konno T, Ho-Chen JK, Soares MJ (2006) The rat prolactin gene family

536 locus: species-specific gene family expansion. *Mamm Genome* 17: 858-877

537

538 Aplin JD, Jones CJP (2021) Cell dynamics in human villous trophoblast. *Hum Reprod Update*

539 27: 904-922

540

541 Asanoma K, Rumi MA, Kent LN, Chakraborty D, Renaud SJ, Wake N, Lee DS, Kubota K,

542 Soares MJ (2011) FGF4-dependent stem cells derived from rat blastocysts differentiate along

543 the trophoblast lineage. *Dev Biol* 351: 110-119

544

545 Brenkman AB, de Keizer PL, van den Broek NJ, Jochemsen AG, Burgering BM (2008) Mdm2

546 induces mono-ubiquitination of FOXO4. *PLoS One* 3: e2819

547

548 Burton GJ, Fowden AL, Thornburg KL (2016) Placental origins of chronic disease. *Physiol*

549 *Rev* 96: 1509-1565

550

551 Burton GJ, Jauniaux E (2018) Pathophysiology of placental-derived fetal growth restriction.

552 *Am J Obstet Gynecol* 218(Suppl): S745-S761

553

554 Chakraborty D, Cui W, Rosario GX, Scott RL, Dhakal P, Renaud SJ, Tachibana M, Rumi MA,

555 Mason CW, Krieg AJ, Soares MJ (2016) HIF-KDM3A-MMP12 regulatory circuit ensures

556 trophoblast plasticity and placental adaptations to hypoxia. *Proc Natl Acad Sci USA* 113:

557 E7212-E7221

558

559 Chen WS, Xu PZ, Gottlob K, Chen ML, Sokol K, Shiyanova T, Roninson I, Weng W, Suzuki R,

560 Tobe K, et al. (2001) Growth retardation and increased apoptosis in mice with homozygous

561 disruption of the *Akt1* gene. *Genes Dev* 15: 2203-2208

562

563 Cho H, Thorvaldsen JL, Chu Q, Feng F, Birnbaum MJ (2001) *Akt1*/PKB $\alpha$  is required for

564 normal growth but dispensable for maintenance of glucose homeostasis in mice. *J Biol Chem*

565 276: 38349-38352

566

567 Cole PA, Chu N, Salguero AL, Bae H (2019) AKTivation mechanisms. *Curr Opin Struct Biol*

568 59: 47-53

569

570 Dash PR, Whitley GS, Ayling LJ, Johnstone AP, Cartwright JE (2005) Trophoblast apoptosis is

571 inhibited by hepatocyte growth factor through the Akt and beta-catenin mediated up-regulation

572 of inducible nitric oxide synthase. *Cell Signal* 17: 571-580

573

574 Dhakal P, Soares MJ (2017) Single-step PCR-based genetic sex determination of rat tissues and  
575 cells. *Biotechniques* 62: 232-233

576

577 Essers MA, Weijzen S, de Vries-Smits AM, Saarloos I, de Ruiter ND, Bos JL, Burgering BM  
578 (2004) FOXO transcription factor activation by oxidative stress mediated by the small GTPase  
579 Ral and JNK. *EMBO J* 23: 4802–4812

580

581 Ferretti C, Bruni L, Dangles-Marie V, Pecking AP, Bellet D (2007) Molecular circuits shared  
582 by placental and cancer cells, and their implications in the proliferative, invasive and migratory  
583 capacities of trophoblasts. *Hum Reprod Update* 13: 121-141

584

585 Fiddes RJ, Campbell DH, Janes PW, Sivertsen SP, Sasaki H, Wallasch C, Daly RJ (1998)  
586 Analysis of Grb7 recruitment by heregulin-activated erbB receptors reveals a novel target  
587 selectivity for erbB3. *J Biol Chem* 273: 7717-7724

588

589 Fisher SJ (2015) Why is placentation abnormal in preeclampsia? *Am J Obstet Gynecol*  
590 213(Suppl): S115-S122

591

592 Fock V, Plessl K, Draxler P, Otti GR, Fiala C, Knöfler M, Pollheimer J (2015)  
593 Neuregulin-1-mediated ErbB2-ErbB3 signalling protects human trophoblasts against  
594 apoptosis to preserve differentiation. *J Cell Sci* 128: 4306-4316

595

596 Fukuoka M, Daitoku H, Hatta M, Matsuzaki H, Umemura S, Fukamizu A (2003) Negative  
597 regulation of forkhead transcription factor AFX (Foxo4) by CBP-induced acetylation. *Int J*  
598 *Mol Med* 12: 503–508



599

600 Gardner RL, Beddington RS (1988) Multi-lineage 'stem' cells in the mammalian embryo. *J*

601 *Cell Sci Suppl* 10: 11-27

602

603 Han BW, Ye H, Wei PP, He B, Han C, Chen ZH, Chen YQ, Wang WT (2018) Global

604 identification and characterization of lncRNAs that control inflammation in malignant

605 cholangiocytes. *BMC Genomics* 19: 735

606

607 Harris LK, Smith SD, Keogh RJ, Jones RL, Baker PN, Knöfler M, Cartwright JE, Whitley GS,

608 Aplin JD (2010) Trophoblast- and vascular smooth muscle cell-derived MMP-12 mediates

609 elastolysis during uterine spiral artery remodeling. *Am J Pathol* 177: 2103-2115

610

611 Haslinger P, Haider S, Sonderegger S, Otten JV, Pollheimer J, Whitley G, Knöfler M (2013)

612 AKT isoforms 1 and 3 regulate basal and epidermal growth factor-stimulated SGHPL-5

613 trophoblast cell migration in humans. *Biol Reprod* 88: 54

614

615 Hemberger M (2002) The role of the X chromosome in mammalian extra embryonic

616 development. *Cytogenet Genome Res* 99: 210-217

617

618 Herman L, Todeschini AL, Veitia RA (2021) Forkhead transcription factors in health and

619 disease. *Trends Genet* 37: 460-475

620

621 Hosaka T, Biggs WH 3rd, Tieu D, Boyer AD, Varki NM, Cavenee WK, Arden KC (2004)

622 Disruption of forkhead transcription factor (FOXO) family members in mice reveals their

623 functional diversification. *Proc Natl Acad Sci USA* 101: 2975–2980

624

625 Huang C, Santofimia-Castaño P, Iovanna J (2021) NUPR1: a critical regulator of the  
626 antioxidant system. *Cancers (Basel)* 13: 3670

627

628 Huang D, Sherman B, Lempicki R (2009) Systematic and integrative analysis of large gene  
629 lists using DAVID bioinformatics resources. *Nat Protoc* 4: 44–57

630

631 Huang H, Tindall DJ (2011) Regulation of FOXO protein stability via ubiquitination and  
632 proteasome degradation. *Biochim Biophys Acta* 1813: 1961–1964

633

634 Iqbal K, Pierce SH, Kozai K, Dhakal P, Scott RL, Roby KF, Vyhlidal CA, Soares MJ (2021)  
635 Evaluation of placentation and the role of the aryl hydrocarbon receptor pathway in a rat model  
636 of dioxin exposure. *Environ Health Perspect* 129: 117001.

637

638 Iwatsuki K, Oda M, Sun W, Tanaka S, Ogawa T, Shiota K (1998) Molecular cloning and  
639 characterization of a new member of the rat placental prolactin (PRL) family, PRL-like protein  
640 H. *Endocrinology* 139: 4976-4983

641

642 Iwatsuki K, Shinozaki M, Sun W, Yagi S, Tanaka S, Shiota K (2000) A novel secretory protein  
643 produced by rat spongiotrophoblast. *Biol Reprod* 62: 1352-1359

644

645 John RM (2017) Imprinted genes and the regulation of placental endocrine function:  
646 pregnancy and beyond. *Placenta* 56: 86-90

647

648 Kamei T, Jones SR, Chapman BM, McGonigle KL, Dai G, Soares MJ (2002) The

649 phosphatidylinositol 3-kinase/Akt signaling pathway modulates the endocrine differentiation  
650 of trophoblast cells. *Mol Endocrinol* 16: 1469-1481  
651  
652 Kaneko T (2017) Genome editing of rat. *Methods Mol Biol* 1630: 101-108.  
653  
654 Kent LN, Konno T, Soares MJ (2010) Phosphatidylinositol 3 kinase modulation of trophoblast  
655 cell differentiation. *BMC Dev Biol* 10: 97  
656  
657 Kent LN, Ohboshi S, Soares MJ (2012) Akt1 and insulin-like growth factor 2 (Igf2) regulate  
658 placentation and fetal/postnatal development. *Int J Dev Biol* 56: 255-261  
659  
660 Kent LN, Rumi MA, Kubota K, Lee DS, Soares MJ (2011) FOSL1 is integral to establishing  
661 the maternal-fetal interface. *Mol Cell Biol* 31: 4801-4813  
662  
663 Knipp GT, Audus KL, Soares MJ (1999) Nutrient transport across the placenta. *Adv Drug*  
664 *Deliv Rev* 38: 41-58  
665  
666 Knöfler M, Haider S, Saleh L, Pollheimer J, Gamage TKJB, James J (2019) Human placenta  
667 and trophoblast development: key molecular mechanisms and model systems. *Cell Mol Life Sci*  
668 76: 3479-3496  
669  
670 Kummer D, Ebnet K (2018) Junctional adhesion molecules (JAMs): the JAM-integrin  
671 connection. *Cells* 7: 25  
672  
673 LaFleur DW, Nardelli B, Tsareva T, Mather D, Feng P, Semenuk M, Taylor K, Buergin M,

- 674 Chinchilla D, Roshke V, et al. (2001) Interferon-kappa, a novel type I interferon expressed in  
675 human keratinocytes. *J Biol Chem* 276: 39765-39771  
676
- 677 Lam EW, Brosens JJ, Gomes AR, Koo CY (2013) Forkhead box proteins: tuning forks for  
678 transcriptional harmony. *Nat Rev Cancer* 13: 482-495  
679
- 680 Liu W, Li Y, Luo B (2020) Current perspective on the regulation of FOXO4 and its role in  
681 disease progression. *Cell Mol Life Sci* 77: 651-663  
682
- 683 Maltepe E, Fisher SJ (2015) Placenta: the forgotten organ. *Annu Rev Cell Dev Biol* 31:  
684 523-552  
685
- 686 Manning BD, Cantley LC (2007) AKT/PKB signaling: navigating downstream. *Cell* 129:  
687 1261-1274  
688
- 689 Manning BD, Toker A (2017) AKT/PKB signaling: navigating the network. *Cell* 169: 381-405  
690
- 691 Mashima R, Okuyama T (2015) The role of lipoxygenases in pathophysiology; new insights  
692 and future perspectives. *Redox Biol* 6: 297-310  
693
- 694 Morey R, Farah O, Kallol S, Requena DF, Meads M, Moretto-Zita M, Soncin F, Laurent LC,  
695 Parast MM (2021) Transcriptomic drivers of differentiation, maturation, and polyploidy in  
696 human extravillous trophoblast. *Front Cell Dev Biol* 9: 702046  
697
- 698 Muto M, Chakraborty D, Varberg KM, Moreno-Irusta A, Iqbal K, Scott RL, McNally RP,

699 Choudhury RH, Aplin JD, Okae H, et al. (2021) Intersection of regulatory pathways  
700 controlling hemostasis and hemochorial placentation. *Proc Natl Acad Sci USA* 118:  
701 e2111267118  
702  
703 Nirgude S, Choudhary B (2021) Insights into the role of GPX3, a highly efficient plasma  
704 antioxidant, in cancer. *Biochem Pharmacol* 184: 114365  
705  
706 Nteeba J, Varberg KM, Scott RL, Simon ME, Iqbal K, Soares MJ (2020) Poorly controlled  
707 diabetes mellitus alters placental structure, efficiency, and plasticity. *BMJ Open Diabetes Res*  
708 *Care* 8: e001243  
709  
710 Pijnenborg R, Robertson WB, Brosens I, Dixon G (1981) Trophoblast invasion and the  
711 establishment of haemochorial placentation in man and laboratory animals. *Placenta* 2:  
712 71-91  
713  
714 Pijnenborg R, Vercruyse L (2010) Animal models of deep trophoblast invasion. In *Placental*  
715 *Bed Disorders*, Pijnenborg R, Brosens I, Romero R (eds) pp 127-139. Cambridge: Cambridge  
716 University Press  
717  
718 Plaks V, Berkovitz E, Vandoorne K, Berkutzki T, Damari GM, Haffner R, Dekel N, Hemmings  
719 BA, Neeman M, Harmelin A (2011) Survival and size are differentially regulated by placental  
720 and fetal PKBalpha/AKT1 in mice. *Biol Reprod* 84: 537-545  
721  
722 Pollheimer J, Knöfler M (2005) Signalling pathways regulating the invasive differentiation of  
723 human trophoblasts: a review. *Placenta* 26(Suppl A): S21-S30

724

725 Qayyum N, Haseeb M, Kim MS, Choi S (2021) Role of thioredoxin-interacting protein in  
726 diseases and its therapeutic outlook. *Int J Mol Sci* 22: 2754

727

728 Qiu Q, Yang M, Tsang BK, Gruslin A (2004) Both mitogen-activated protein kinase and  
729 phosphatidylinositol 3-kinase signalling are required in epidermal growth factor-induced  
730 human trophoblast migration. *Mol Hum Reprod* 10: 677-684

731

732 Roberts RM, Green JA, Schulz LC (2016) The evolution of the placenta. *Reproduction* 152:  
733 R179-R189

734

735 Satapathy S, Wilson MR (2021) The dual roles of clusterin in extracellular and intracellular  
736 proteostasis. *Trends Biochem Sci* 46: 652-660

737

738 Schmitt-Ney M (2020). The FOXO's advantages of being a family: considerations on function  
739 and evolution. *Cells* 9: 787

740

741 Sharma N, Kubaczka C, Kaiser S, Nettersheim D, Mughal SS, Riesenberger S, Hölzel M,  
742 Winterhager E, Schorle H (2016) Tpbpa-Cre-mediated deletion of TFAP2C leads to  
743 deregulation of Cdkn1a, Akt1 and the ERK pathway, causing placental growth arrest.  
744 *Development* 143: 787-798

745

746 Shukla V, Soares MJ (2022) Modeling trophoblast cell-guided uterine spiral artery  
747 transformation in the rat. *Int J Mol Sci* 23: 2947

748

749 Sies H, Cadenas E (1985) Oxidative stress: damage to intact cells and organs. *Philos Trans R*  
750 *Soc Lond B Biol Sci* 311: 617-631

751

752 Soares MJ (2004) The prolactin and growth hormone families: pregnancy-specific  
753 hormones/cytokines at the maternal-fetal interface. *Reprod Biol Endocrinol* 2: 51

754

755 Soares MJ, Chakraborty D, Rumi MAK, Konno T, Renaud SJ (2012) Rat placentation: an  
756 experimental model for investigating the hemochorial maternal-fetal interface. *Placenta* 33:  
757 233-243

758

759 Soares MJ, Chapman BM, Rasmussen CA, Dai G, Kamei T, Orwig KE (1996) Differentiation  
760 of trophoblast endocrine cells. *Placenta* 17: 277-289

761

762 Soares MJ, Konno T, Alam SM (2007) The prolactin family: effectors of pregnancy-dependent  
763 adaptations. *Trends Endocrinol Metab* 18: 114-121

764

765 Soares MJ, Varberg KM, Iqbal K (2018) Hemochorial placentation: development, function,  
766 and adaptations. *Biol Reprod* 99: 196-211

767

768 Takagi N, Sasaki M (1975) Preferential inactivation of the paternally derived X chromosome in  
769 the extraembryonic membranes of the mouse. *Nature* 256: 640-642

770

771 van der Horst A, de Vries-Smits AM, Brenkman AB, van Triest MH, van den Broek N, Colland  
772 F, Maurice MM, Burgering BM (2006) FOXO4 transcriptional activity is regulated by

773 monoubiquitination and USP7/HAUSP. *Nat Cell Biol* 8: 1064–1073

774

775 Varberg KM, Iqbal K, Muto M, Simon ME, Scott RL, Kozai K, Choudhury RH, Aplin JD,

776 Biswell R, Gibson M, *et al.*, (2021) ASCL2 reciprocally controls key trophoblast lineage

777 decisions during hemochorial placenta development. *Proc Natl Acad Sci USA* 118:

778 e2016517118

779

780 West JD, Papaioannou VE, Frels WI, Chapman VM (1978) Preferential expression of the

781 maternally derived X chromosome in extraembryonic tissues of the mouse. *Basic Life Sci* 12:

782 361-377

783

784 Wooding P & Burton G (2008) *Comparative Placentation*. Springer-Verlag, Heidelberg,

785 Germany

786

787 Yang ZZ, Tschopp O, Hemmings-Mieszczak M, Feng J, Brodbeck D, Perentes E, Hemmings

788 BA (2003) Protein kinase B alpha/Akt1 regulates placental development and fetal growth. *J*

789 *Biol Chem* 278: 32124-32131

790

791

## 792 **FIGURE LEGENDS**

793 **Figure 1. In vivo genome editing of the rat *Akt1* locus. A)** Schematic representation of the

794 rat *Akt1* gene (*Akt1*<sup>+/+</sup>) and guide RNA target sites within Exons 4 and 7 (NM\_033230.3). Red

795 bars beneath Exons 4 and 7 correspond to the 5' and 3' guide RNAs used in the genome

796 editing. **B)** The mutant *Akt1* allele (*Akt1*<sup>-/-</sup>) possesses a 1,332 bp deletion. Parts of Exons 4

797 and 7 and all of Exons 5 and 6 are deleted, leading to a frameshift and premature Stop codon

798 in Exon 7. **C)** Amino acid sequences for AKT1<sup>+/+</sup> and AKT1<sup>-/-</sup>. The red sequence corresponds



799 to the frameshift in Exon 7. The blue, red, and green highlighted amino acid sequence regions  
800 correspond to the pleckstrin homology (PH), kinase, and regulatory domains, respectively. **D**  
801 Offspring were backcrossed to wild type rats, and heterozygous mutant rats were intercrossed  
802 to generate homozygous mutants. Wild type (+/+), heterozygous (+/-), and homozygous  
803 mutant (-/-) genotypes were detected by PCR. **E**) Western blot analysis of AKT1, pan-AKT,  
804 phospho (p)-AKT (Ser<sup>473</sup>) protein in *Akt1*<sup>+/+</sup> and *Akt1*<sup>-/-</sup> placentas at gd 18.5. GAPDH was  
805 used as a loading control.

806

807 **Figure 2. *Akt1*<sup>-/-</sup> placentas and fetuses are growth restricted, and *Akt1*<sup>-/-</sup> rats exhibit**  
808 **postnatal growth restriction.** Placentas (**A**) and fetuses (**B**) were dissected from *Akt1*<sup>+/-</sup>  
809 intercrosses at gd 18.5 and weighed; **C**, fetus/placenta ratio. Placentas were then separated  
810 into junctional zone (**JZ**; **D**) and labyrinth zone (**LZ**;**E**) compartments, and weighed; **F**, JZ/JZ  
811 ratio. Graphs represent means ± SEM. *Akt1*<sup>+/+</sup>, n = 22 from 6 dams; *Akt1*<sup>-/-</sup>, n = 17 from 6  
812 dams. Asterisks denote statistical differences (\*\**P* < 0.01; \*\*\**P* < 0.001) as determined by  
813 Student's or Welch's *t*-test. Body weights of *Akt1*<sup>+/+</sup> and *Akt1*<sup>-/-</sup> pups were measured from two  
814 to eight weeks after birth: males (**G**) and females (**H**). Graphs represent means ± SEM. n =  
815 13-23/group. Asterisks denote statistical differences (\**P* < 0.05; \*\*\**P* < 0.001) as determined  
816 by Student's or Welch's *t*-test. **I**) Vimentin immunostaining of gd 18.5 *Akt1*<sup>+/+</sup> and *Akt1*<sup>-/-</sup>  
817 placentation sites. The junctional zone (**JZ**) is negative for vimentin immunostaining,  
818 whereas the uterine-placental interface (**UPI**) and labyrinth zone (**LZ**) stain positive for  
819 vimentin. Scale bars=1000 μm

820

821 **Figure 3. AKT1 deficiency alters the transcriptomes of the junctional zone.** **A**) Heat maps  
822 depicting differentially expressed genes between *Akt1*<sup>+/+</sup> and *Akt1*<sup>-/-</sup> junctional zones. The  
823 heatmap color keys represent z-scores of TPM values. **B**) RT-qPCR validation of RNA-seq

824 results (n=6/group). Graphs represent means  $\pm$  SEM. Asterisks denote statistical difference  
825 (\* $P$ <0.05; \*\* $P$ <0.01; \*\*\* $P$ <0.001) as determined by Student's or Welch's  $t$ -test.

826

827 **Figure 4. FOXO4 is a target of PI3K/AKT signaling.** **A)** Expressions of transcripts for  
828 several FOX transcription factors in the junctional zone. **B)** In situ localization of transcripts  
829 for *Foxo4* with *Prl7b1* (invasive trophoblast-specific transcript) in the placentation site at gd  
830 18.5 of rat pregnancy. Scale bars = 1000  $\mu$ m. **C)** RT-qPCR measurements of *Foxo4*  
831 transcripts in the uterine-placental interface, junctional and labyrinth zones during the second  
832 half of gestation (n = 6-9/group). Graphs represent means  $\pm$  SEM. Asterisks denote statistical  
833 difference (\*\* $P$  < 0.01) as determined by Steel test. UPI: uterine-placental interface; JZ:  
834 junctional zone; and LZ: labyrinth zone. **D)** Western blot analysis of phospho (p)-FOXO4  
835 (Ser<sup>262</sup>) and FOXO4 proteins in *Akt1*<sup>+/+</sup> and *Akt1*<sup>-/-</sup> placentas at gd 18.5. GAPDH was used as  
836 a loading control. **E)** RT-qPCR measurements of *Foxo4* transcripts in the stem state and  
837 following induction of differentiation (n = 4-6/group). Graphs represent means  $\pm$  SEM.  
838 Asterisks denote statistical difference (vs Stem, \* $P$  < 0.05) as determined by Dunnett's test.  
839 Western blot analysis of phospho (p)-FOXO4 (Ser<sup>262</sup>), FOXO4, p-AKT (Ser<sup>473</sup>), and  
840 pan-AKT proteins in the stem and differentiating (day 15 of differentiation, D15) states (**F**),  
841 and in the differentiating state (D15) following treated with vehicle (0.1% DMSO) or a  
842 phosphatidylinositol 3-kinase (**PI3K**) inhibitor (LY294002, 10  $\mu$ M) for 1 h (**G**). GAPDH was  
843 used as a loading control.

844

845 **Figure 5. In vivo genome editing of the rat *Foxo4* locus.** **A)** Schematic representation of  
846 the rat *Foxo4* gene (*Foxo4*<sup>Xm+</sup>) and guide RNA target sites within Exons 2 and 3  
847 (NM\_001106943.1). Red bars beneath Exons 2 and 3 correspond to the 5' and 3' guide RNAs  
848 used in the genome editing. **B)** The mutant *Foxo4* allele (*Foxo4*<sup>Xm-</sup>) possesses a 3,096 bp

849 deletion. Parts of Exons 2 and 3 are deleted, leading to a frameshift and premature Stop  
850 codon in Exon 3. **C)** Amino acid sequences for FOXO4<sup>Xm+</sup> and FOXO4<sup>Xm-</sup>. The red sequence  
851 corresponds to the frameshift in Exon 3. The green, red, dark blue, and light blue highlighted  
852 amino acid sequence regions correspond to the forkhead winged-helix DNA-binding domain  
853 (**FHD**), nuclear localization sequence (**NLS**), nuclear export sequence (**NES**), and  
854 transactivation domain (**TAD**), respectively. **D)** Heterozygous mutant female rats were  
855 crossed to wild type male rats to generate hemizygous null male rats. Wild type (+/+),  
856 heterozygous (+/-), and hemizygous null (-/y) genotypes were detected by PCR. **E)** Western  
857 blot analysis of FOXO4 protein in the junctional zone of *Foxo4*<sup>Xm+</sup> (X<sup>m+</sup>Y and X<sup>m+</sup>X<sup>p+</sup>) and  
858 *Foxo4*<sup>Xm-</sup> (X<sup>m-</sup>Y and X<sup>m-</sup>X<sup>p+</sup>) placentas at gd 18.5. GAPDH was used as a loading control.  
859

860 **Figure 6. *Foxo4* hemizygous null and *Foxo4* maternally inherited heterozygous**  
861 **conceptuses exhibit placental overgrowth, and FOXO4 deficiency alters the**  
862 **transcriptomes of the junctional zone.** Placentas (**A**) and fetuses (**B**) were dissected from  
863 *Foxo4* heterozygous females mated with wild type males at gd 18.5 and weighed; **C)**  
864 fetus/placenta ratio. Placentas were then separated into junctional zone (**JZ**, **D**) and labyrinth  
865 zone (**LZ**, **E**) compartments, and weighed; **F**, JZ/LZ weight ratio. Graphs represent means ±  
866 SEM. X<sup>m+</sup>Y, n = 25; X<sup>m-</sup>Y, n = 31; X<sup>m+</sup>X<sup>p+</sup>, n = 14; X<sup>m-</sup>X<sup>p+</sup>, n = 22 from 8 dams. Asterisks  
867 denote statistical differences (\*\*\*)  $P < 0.001$  as determined by Student's or Welch's *t*-test. **G)**  
868 Vimentin immunostaining of gd 18.5 *Foxo4*<sup>Xm+</sup> and *Foxo4*<sup>Xm-</sup> placentation sites. The  
869 junctional zone (**JZ**) is negative for vimentin immunostaining, whereas the uterine-placental  
870 interface (**UPI**) and labyrinth zone (**LZ**) stain positive for vimentin. Scale bars=1000 μm. **H)**  
871 Heat maps depicting differentially expressed genes in *Foxo4*<sup>Xm+</sup> versus *Foxo4*<sup>Xm-</sup> junctional  
872 zones. The heatmap color keys represent z-scores of TPM values. **I)** RT-qPCR validation of  
873 RNA-seq results (n=6/group). Graphs represent means ± SEM. Asterisks denote statistical

874 difference (\*\* $P < 0.01$ ; \*\*\* $P < 0.001$ ) as determined by Student's or Welch's *t*-test.

875

876 **Figure 7. Reciprocal relationship between AKT1 and FOXO4 in the junctional zone.**

877 Venn diagram and heatmaps representing overlap of differentially expressed genes inversely

878 regulated by AKT1 and FOXO4. The heatmap color keys represent z-scores of TPM values.

879

880 **Figure 8. FOXO4 alters the rat TS cell.** FOXO4 knockdown efficiency was validated by

881 RT-qPCR (**A**,  $n = 4$ /group) or western blot (**B**) analyses in rat TS cells at day 15 of

882 differentiation following transduction with lentivirus containing a control shRNA or one of

883 two independent *Foxo4*-specific shRNAs. Graphs represent means  $\pm$  SEM. Asterisks denote

884 statistical difference (vs Control shRNA, \* $P < 0.05$ ) as determined by Student's or Welch's

885 *t*-test. **C**) Heatmap depicting differentially expressed genes between control and *Foxo4*

886 shRNA-treated rat TS cells. **D**) RT-qPCR validation of RNA-seq results (Control shRNA,  $n =$

887 4; *Foxo4* shRNA 1,  $n = 4$ ; *Foxo4* shRNA 2,  $n = 4$ ). Graphs represent means  $\pm$  SEM. Asterisks

888 denote statistical difference (compared to Control shRNA, \* $P < 0.05$ ; \*\* $P < 0.01$ ; \*\*\* $P <$

889 0.001) as determined by Student's or Welch's *t*-test.

**Figure 1**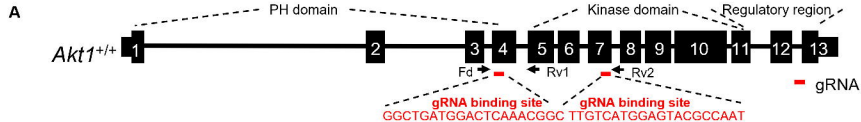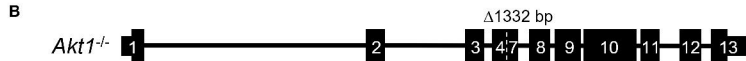

**C**

AKT1<sup>+/+</sup>

MNDVAIVKEGWLHHRGEYIKTWRPRYFLLKNDGTFIGYKERP  
 QDVEQRESPLNNFSVAQCQLMKTERPRPNTFIIRCLQWTTVIE  
 RTFHVETPEERE EWTTAIQTVADGLKQRQEEETMDFRSGSPSD  
 NSGAEEMEVALAKPKHRVTMNEFEYLKLLGKGTFGKVILVKEK  
 ATGRYYAMKILKKEVIVAKDEVAHTLTENRVLQNSRHPFLTAL  
 KYSFQTHDRLCFVMEYANGGELFFHLSRERVFSEDRARFYGA  
 EIVSALDYLDHSEKNVYRDLKLENLMLDKDGHIKITDFGLCKEG  
 IKDGATMKTFCGTPPEYLAPEVLEDNDYGRAVDWWGLGVVMY  
 EMMCGRLPFYNQDHEKLFELILMEEIRFPRTLGPPEAKSLLSGL  
 LKKDPTQRLGGGSEDAKEIMQHRFFANIVWQDVYEKKLSPPF  
 KPQVTSETDTRYFDEEFTAQMITITPPDQDDSMCECVDSERRP  
 HFPQFSYSASGTA

AKT1<sup>-/-</sup>

MNDVAIVKEGWLHHRGEYIKTWRPRYFLLKNDGTFIGYKERP  
 QDVEQRESPLNNFSVAQCQLMKTERPRPNTFIIRCLQWTTVIE  
 RTFHVETPEERE EWTTAIQTVADGLKQWGRALLPPVS Stop

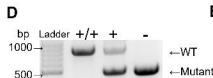

PH domain  
 Kinase domain  
 Regulatory region

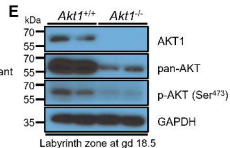

**Figure 2**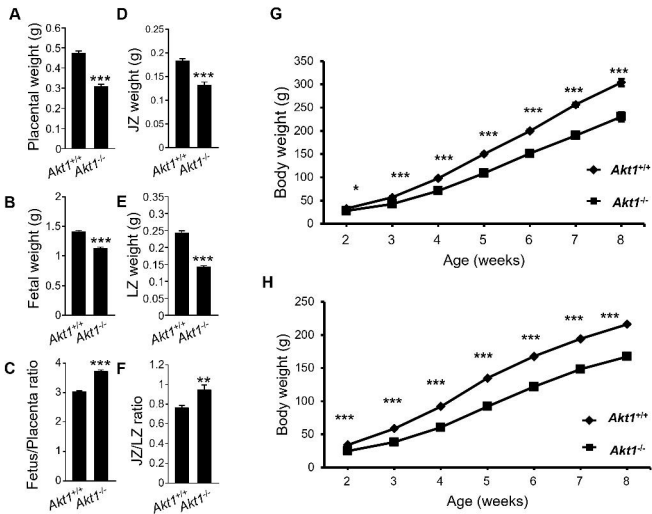**I**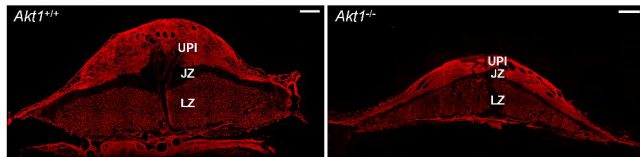

Figure 3

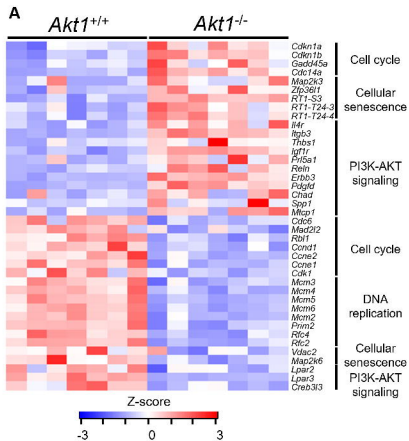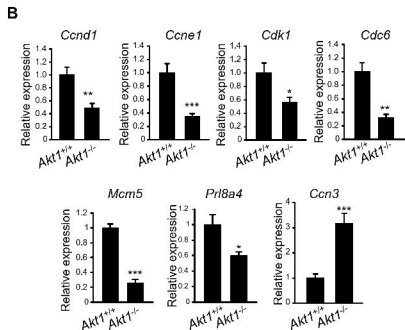

**Figure 4**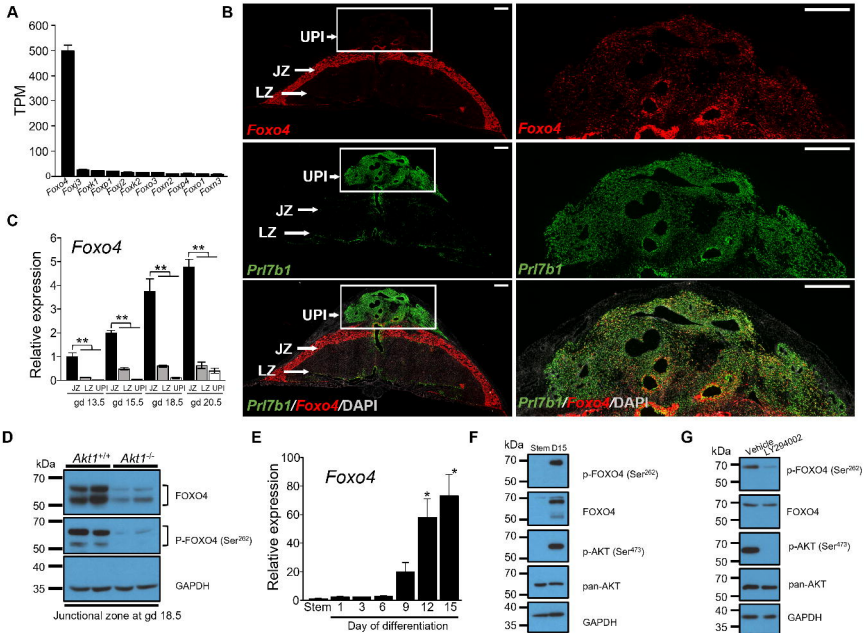



**Figure 5**

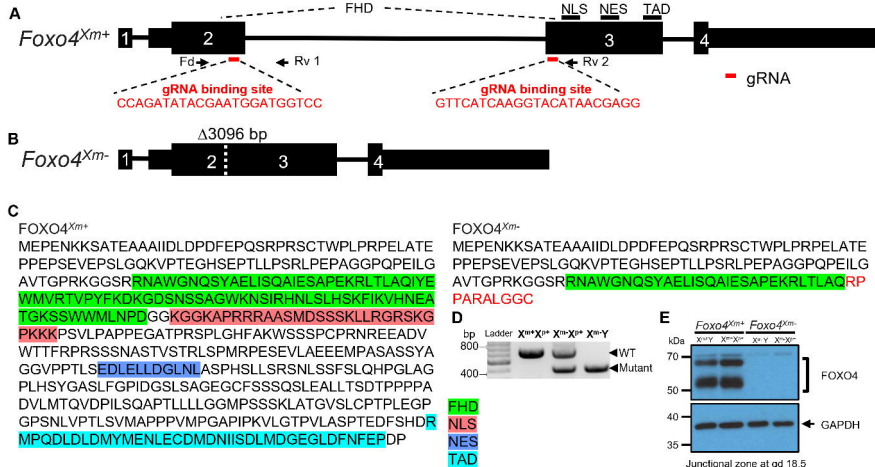

**Figure 6**

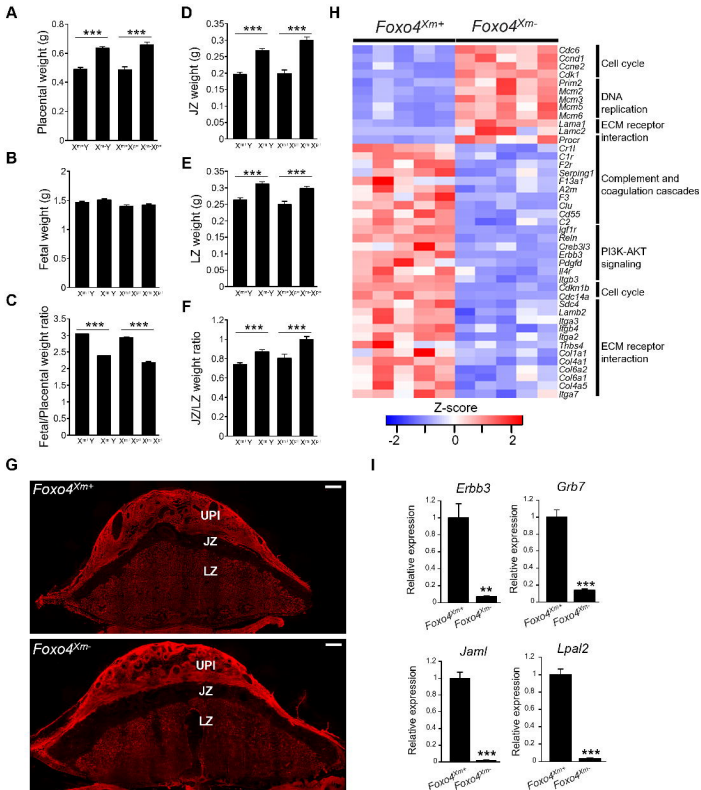

**Figure 7**

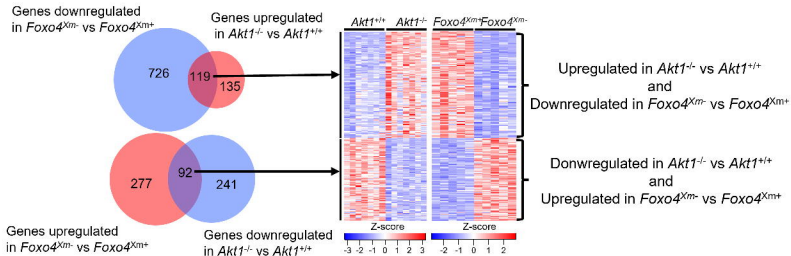

**Figure 8****A**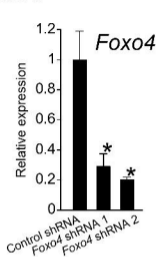**B**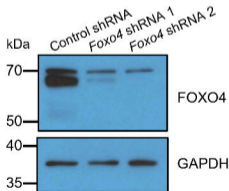**C**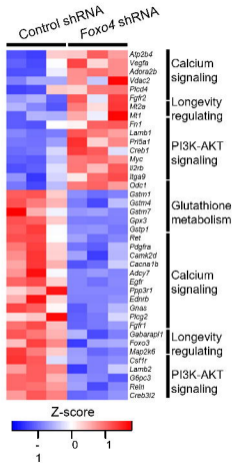**D**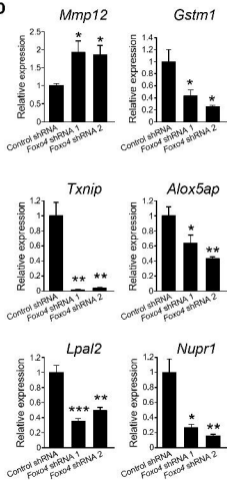

Source: https://www.biorxiv.org/content/biorxiv/early/2022/06/17/2022.06.15.496110.full.pdf
